# Supplementary material
Source: Springer Nature journal article supplement (https://www.springermedizin.de/resource/supplementary/12967_2010_461_MOESM2_ESM.pdf/9576590)

a)

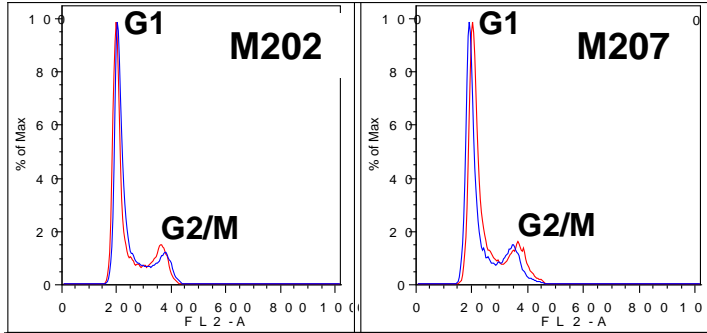

b)

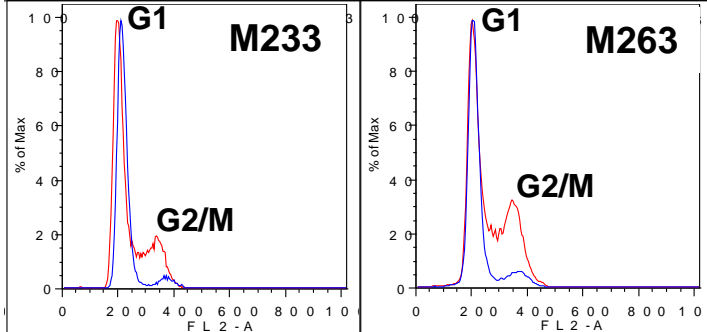

c)

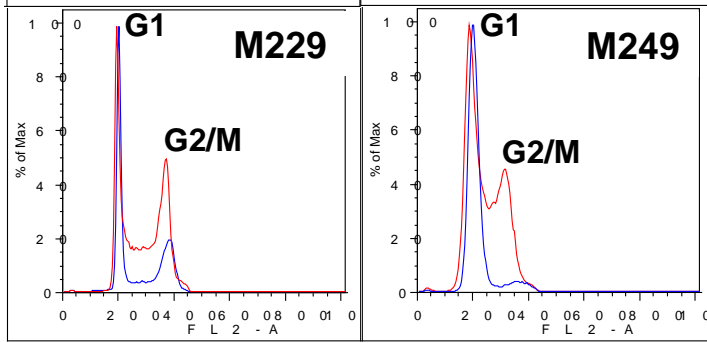

— Vehicle control  
— PLX4032 1  $\mu$ M

| Cell line | %G1  | %S   | %G2/M |
|-----------|------|------|-------|
| M202      | 53.5 | 27.4 | 19.1  |
|           | 56.5 | 27.1 | 16.7  |
| M207      | 53.5 | 28.5 | 16.8  |
|           | 55.2 | 26.3 | 16.8  |
| M233      | 62.6 | 21.8 | 15.3  |
|           | 89.7 | 3.56 | 0     |
| M263      | 50.6 | 25.5 | 22    |
|           | 80.5 | 9.75 | 8.57  |
| M229      | 24.7 | 42.7 | 29.5  |
|           | 49.4 | 14.8 | 33.3  |
| M249      | 46.1 | 29.9 | 21.6  |
|           | 85.7 | 0.45 | 15.1  |

d)

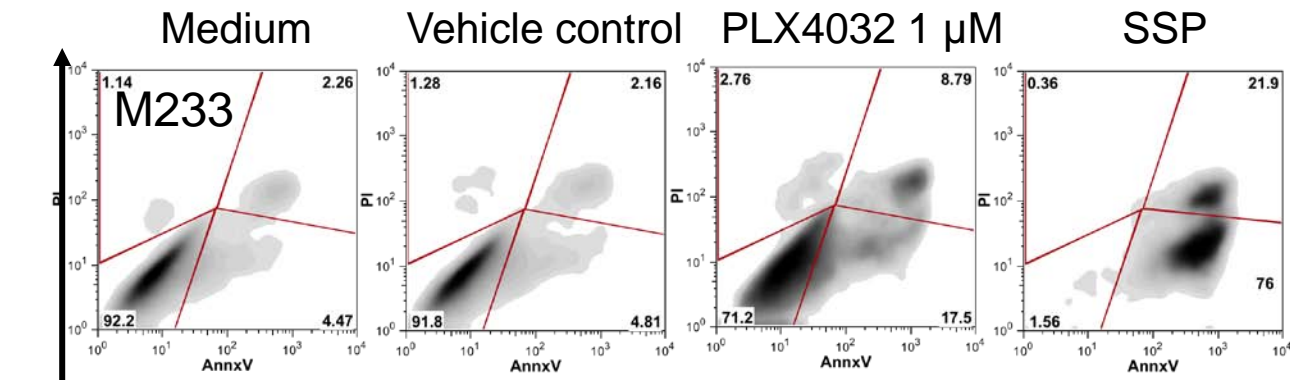

e)

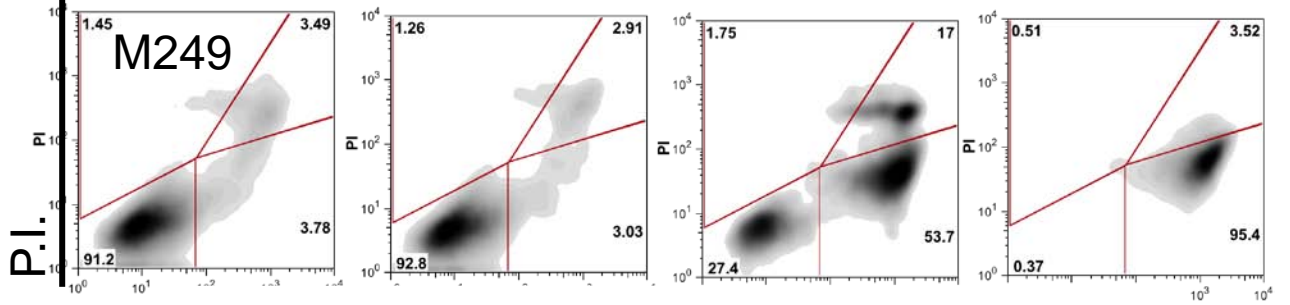

Annexin V

Supplement: MOESM2 [file 9576590]
